# Supplementary material
Source: publisher figshare collection journal article supplement (https://frontiersin.figshare.com/ndownloader/files/29091060)
Supplement: Supplementary file [file 29091060]

Supplementary Figure 3: Exemplary heatmap for a patient with immunological improvement after ECP cycle 5 but not in the follow-up period detected in a dataset of patients prior to (pre-HTx) or with long-term heart transplantation (LT-HTx).

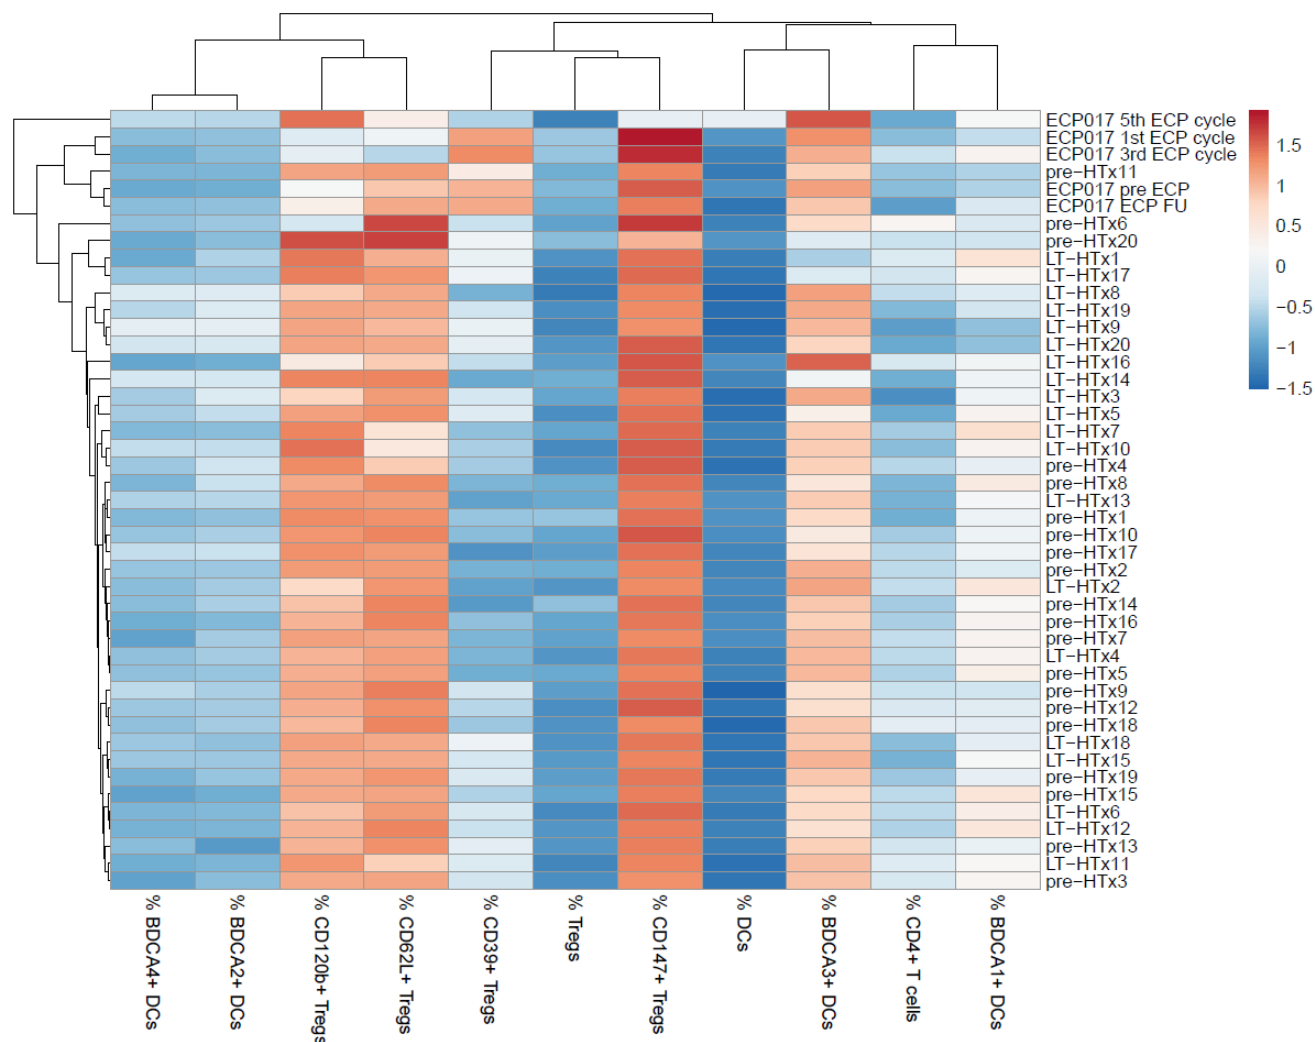

Footnote Supplementary Figure 3: BDCA1/2/3/4, blood dendritic cell antigen 1/2/3/4; CD, cluster of differentiation; DCs, dendritic cells; ECP, extracorporeal photopheresis; FU, follow-up; T<sub>regs</sub>, regulatory T cells
